# Supplementary material
Source: Springer Nature journal article supplement (https://www.springermedizin.de/resource/supplementary/12943_2013_1121_MOESM9_ESM.pdf/9552532)

**E**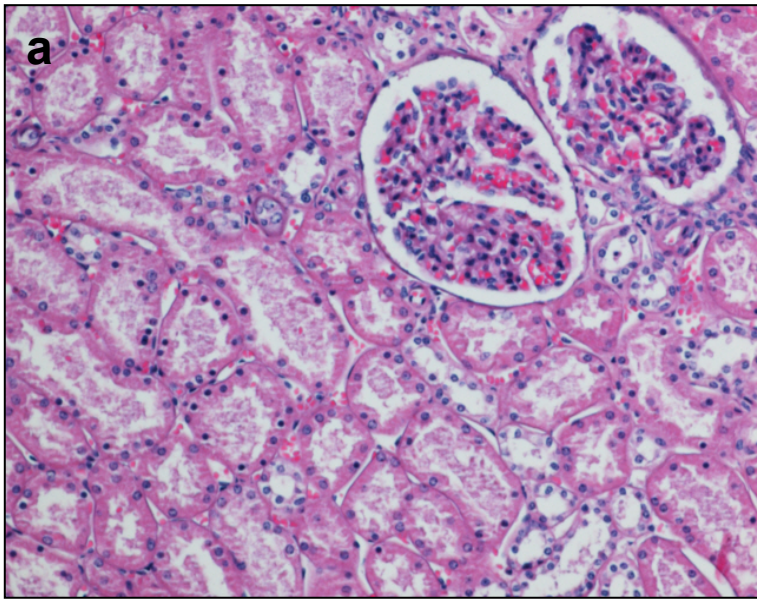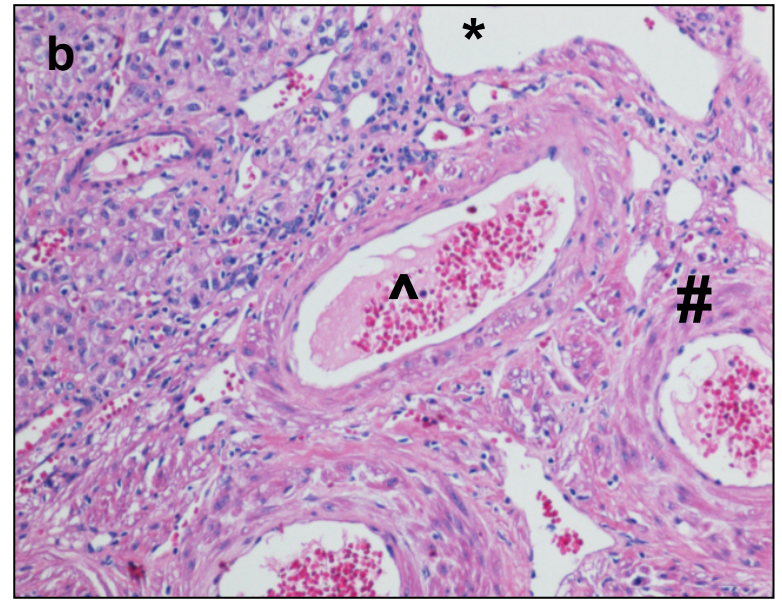**F**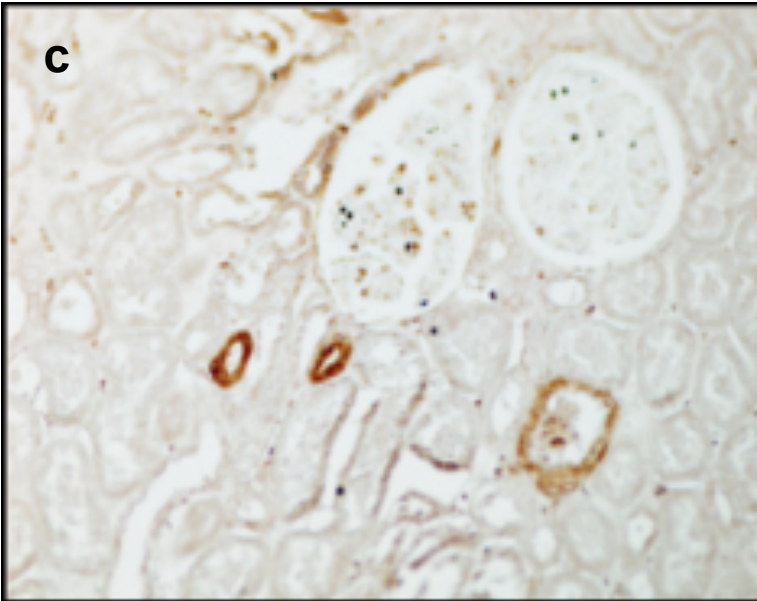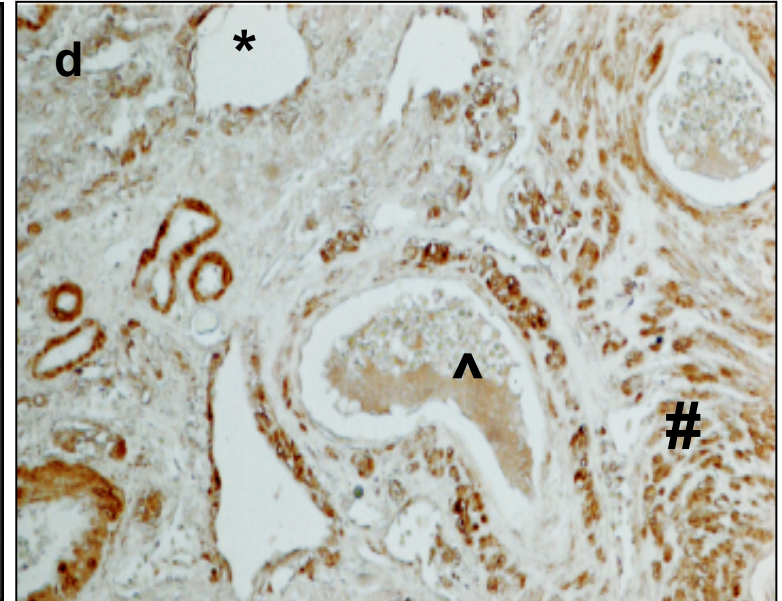

**Figure 6**

Supplement: MOESM9 [file 9552532]
